# Supplementary material for: Safety and efficacy of human juvenile chondrocyte-derived cell sheets for osteochondral defect treatment
Source: PubMed Central journal article supplement (PMC8520001; doi:10.1038/s41536-021-00173-9), 2021-10-15

1 **ADDITIONAL INFORMATION**

2

3 Supplementary Figure 1. Gating strategy of flow cytometry analysis. First box shows  
4 total events. Second and third boxes show the doublet exclusion by eliminating high  
5 forward scatter width and side scatter width, respectively. Fourth box shows dead cell  
6 exclusion by propidium iodide (PI) staining. PI negative population was used for cell  
7 surface marker analysis in Fig 3B. At least 30,000 events were obtained for each target  
8 analysis.

9

10 Supplementary Figure 2. Histological analysis of P9 juvenile chondrocyte sheet.  
11 Hematoxylin and eosin staining, Safranin-O staining, Toluidine blue staining,  
12 aggrecan, type I collagen, and type II collagen immunohistochemistry of P9 JCC  
13 sheets are shown. Bars: 50  $\mu\text{m}$ .

14

15 Supplementary Figure 3. Transplantation results of Sprague Dawley rats. (A)  
16 macroscopic images of patellofemoral groove defects with or without JCC sheet  
17 treatment. (B) Safranin O staining of cartilage samples at 4 weeks post operation. Rxx  
18 indicates animal ID.

19

20 Supplementary Figure 4. Safranin-O staining of native knee and defect-created knee.  
21 (A) and (D) Native knee tissue without any treatment. (B) and (E) Immediately after the  
22 defect creation. (C) and (F) Two days after the defect creation. Bars: 500  $\mu\text{m}$  (A-C),  
23 100  $\mu\text{m}$  (D-F).

24

25 Supplementary Figure 5. Validation of human-specific vimentin antibody staining. Left  
26 column shows human vimentin antigen-specific staining. Right column shows species  
27 cross-reacting vimentin staining. Top row: No defect native rat cartilage. Middle row:

1 JCC sheet treatment group harvested at 4 weeks post operation. Bottom row: defect  
2 only group at 4 weeks post operation.

3

4 Supplementary Figure 6. All measured values of rat weight bearing experiment. (A) All  
5 raw data of calculated weight distributions of 2-4 weeks after the treatment. X-axis  
6 shows weight distribution (%) on the treated hind leg. Y-axis shows animal ID. Circles:  
7 JCC sheet treatment group (top); Triangles: Defect only group (bottom). (B) Fold  
8 change of body weight after treatment. Blue: defect only group, Red: JCC sheet  
9 treatment group.

10

1 **Supplementary Table 1. Antibodies used in flow cytometry**

| Targets                                              | Conjugate | Vendor    | Cat #  | Clone                                                                     | Lot     | Concentration                         | Dilution factors               |
|------------------------------------------------------|-----------|-----------|--------|---------------------------------------------------------------------------|---------|---------------------------------------|--------------------------------|
| CD45                                                 | PB        | Biolegend | 304021 | HI30 (IgG1κ)                                                              | B225702 | 500 µg/mL                             | 5:100                          |
| HLA-ABC                                              | PB        | Biolegend | 311417 | W6/32 (IgG2a)                                                             | B191432 | 500 µg/mL                             | 3:100                          |
| CD31                                                 | AF488     | Biolegend | 303109 | WM59 (IgG1κ)                                                              | B190516 | 400 µg/mL                             | 5:100                          |
| HLA<br>-DR, -DP, -DQ                                 | FITC      | Biolegend | 361705 | Tu39 (IgG2a)                                                              | B228758 | 200 µg/mL                             | 5:100                          |
| CD44                                                 | PE        | Biolegend | 338807 | BJ18 (IgG1κ)                                                              | B222834 | 50 µg/mL                              | 1:100                          |
| CD90                                                 | PE        | Biolegend | 328109 | 5E10 (IgG1κ)                                                              | B206721 | 50 µg/mL                              | 1:100                          |
| CD106                                                | APC       | Biolegend | 305809 | STA (IgG1κ)                                                               | B208208 | 100 µg/mL                             | 5:100                          |
| CD81                                                 | APC       | BD        | 551112 | JS-81 (IgG1κ)                                                             | 8005529 | 12.5 µg/mL                            | 20:100                         |
| Lineage<br>(CD3, CD14,<br>CD16, CD19,<br>CD20, CD56) | APC       | Biolegend | 348803 | Mix of 6 ab<br>(CD3, CD14,<br>CD16, CD19,<br>CD56: IgG1κ,<br>CD20: IgG2b) | B199913 | IgG1: 99.25 µg/mL<br>IgG2b 6.25 µg/mL | 20:100                         |
| Normal<br>IgG1κ                                      | PB        | Biolegend | 400131 | MOPC-21<br>(IgG1κ)                                                        | B229538 | 500 µg/mL                             | Set as same<br>conc. as sample |
| Normal<br>IgG2a                                      | PB        | Biolegend | 400235 | MOPC-173<br>(IgG2a)                                                       | B243657 | 500 µg/mL                             | Set as same<br>conc. as sample |
| Normal<br>IgG1κ                                      | AF488     | Biolegend | 400129 | MOPC-21<br>(IgG1κ)                                                        | B220820 | 200 µg/mL                             | Set as same<br>conc. as sample |
| Normal<br>IgG2a                                      | FITC      | Biolegend | 400207 | MOPC-173<br>(IgG2a)                                                       | B235551 | 500 µg/mL                             | Set as same<br>conc. as sample |
| Normal<br>IgG1κ                                      | PE        | Biolegend | 400111 | MOPC-21<br>(IgG1κ)                                                        | B244596 | 200 µg/mL                             | Set as same<br>conc. as sample |
| Normal<br>IgG1κ                                      | APC       | Biolegend | 400120 | MOPC-21<br>(IgG1κ)                                                        | B257952 | 200 µg/mL                             | Set as same<br>conc. as sample |
| Normal<br>IgG2b                                      | APC       | Biolegend | 400319 | MPC-11 (IgG2b)                                                            | B202284 | 200 µg/mL                             | Set as same<br>conc. as sample |

1 **Supplementary Table 2. Primary antibodies used in immunohistochemistry**

| Target         | Host   | Clone/ID         | Dilution factors | Original conc.  | Vendor/producer     | Cat #      |
|----------------|--------|------------------|------------------|-----------------|---------------------|------------|
| COL II         | Mouse  | 2B1.5 (IgG2a)    | 1:200            | 200 µg/mL       | Invitrogen (Thermo) | MA5-12789  |
| COL I          | Goat   | poly             | 1:200            | 400 µg/mL       | Southern Biotech    | 1310-01    |
| Aggrecan       | Goat   | poly             | 1:100            | 200 µg/mL       | R&D                 | AF1220     |
| Human Vimentin | Rabbit | SP20             | 1:200            | 10 - 50 µg/mL   | Abcam               | ab16700    |
| Vimentin       | Rabbit | EPR3776          | 1:400            | 264 - 268 µg/ml | Abcam               | Ab92547    |
| Isotype        | Mouse  | IgG2a            | 1:100            | 100 µg/mL       | Dako/Agilent        | X0943      |
| Isotype        | Mouse  | IgG1κ<br>DAK-GO1 | 1:10             | 100 µg/mL       | Dako/Agilent        | X0931      |
| Isotype        | Goat   | -                | 1:50             | 100 µg/mL       | Chalbiochem /Merck  | NI02-100UG |
| Isotype        | Rabbit | -                | 1:200,000        | 15 mg/mL        | Dako                | X0936      |

2

3

4 **Supplementary Table 3. Secondary antibodies used in immunohistochemistry**

| Target     | Host   | Conjugate | Dilution factors | Original conc. | Vendor              | Cat #       |
|------------|--------|-----------|------------------|----------------|---------------------|-------------|
| Mouse IgG  | Goat   | HRP       | 1:1000           | 0.8 mg/mL      | Jackson             | 115-035-166 |
| Goat IgG   | Donkey | HRP       | 1:1000           | 0.8 mg/mL      | Jackson             | 705-035-147 |
| Rabbit IgG | Goat   | HRP       | 1:1000           | 0.8 mg/mL      | Jackson             | 111-035-144 |
| Mouse IgG  | Donkey | AF488     | 1:500            | 2 mg/mL        | Invitrogen (Thermo) | A-21202     |
| Rabbit IgG | Goat   | AF568     | 1:500            | 2 mg/mL        | Invitrogen (Thermo) | A-11011     |

# Supplementary Figure 1. Gating strategy of flow cytometry analysis

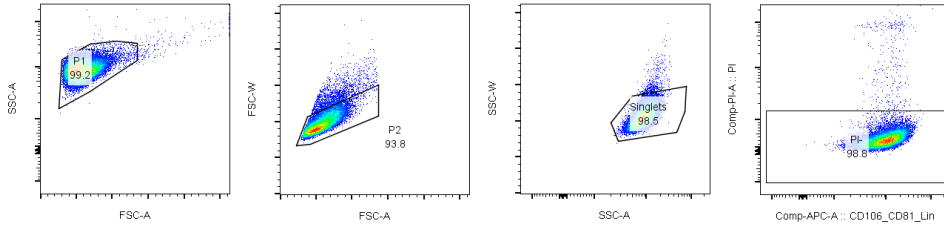

**Supplementary Figure 2. Histological analysis of P9 juvenile chondrocyte sheet**

H&E

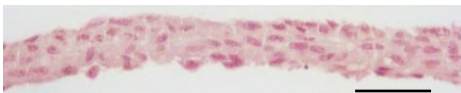

Safranin-O

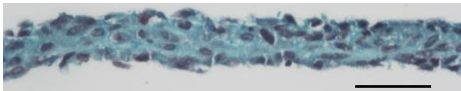

Toluidine  
blue

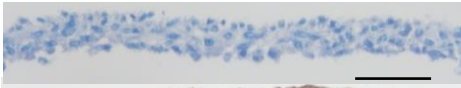

Aggrecan

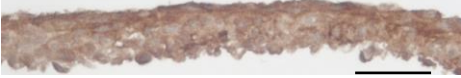

Collagen I

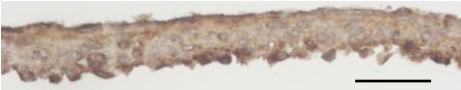

Collagen II

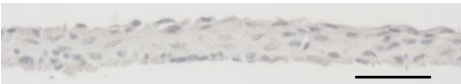

Supplementary Figure 3. Transplantation results of Sprague Dawley rats.

A

**Defect only**

**JCC sheet treatment**

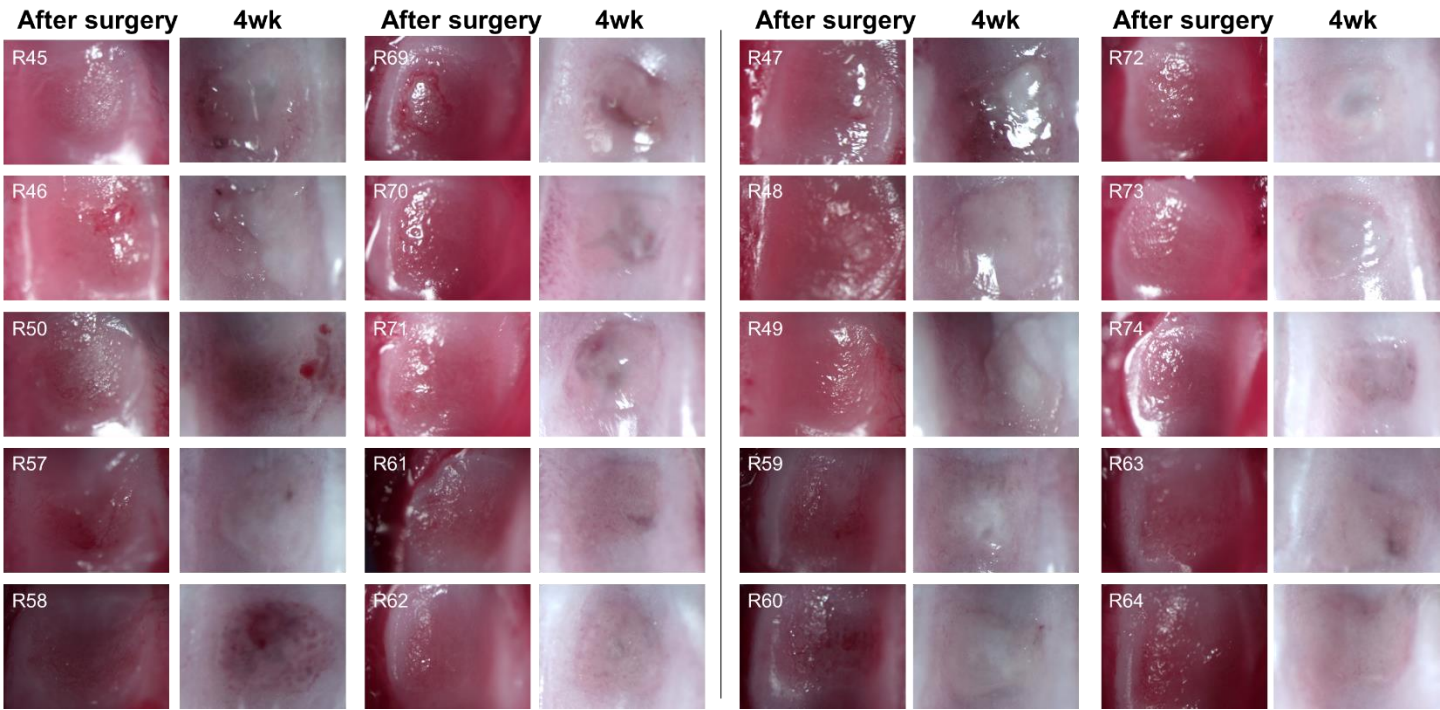

B

**Defect only**

**JCC sheet treatment**

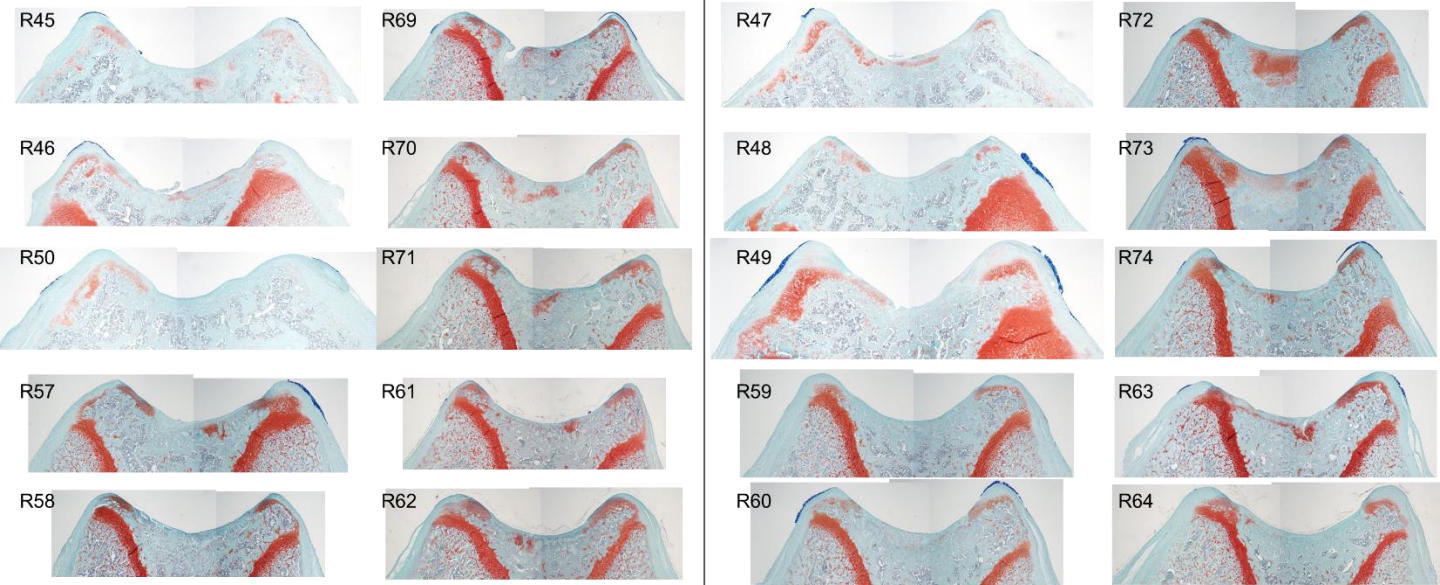

Supplementary Figure 4. Safranin-O staining of native knee and defect-created knee

Native

Immediately after  
the defect creation

Two days after  
the defect creation

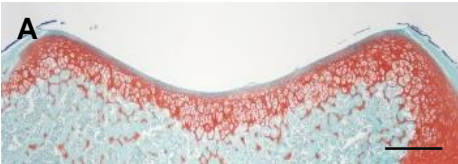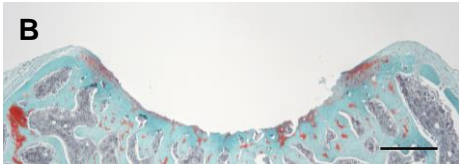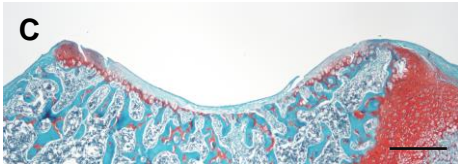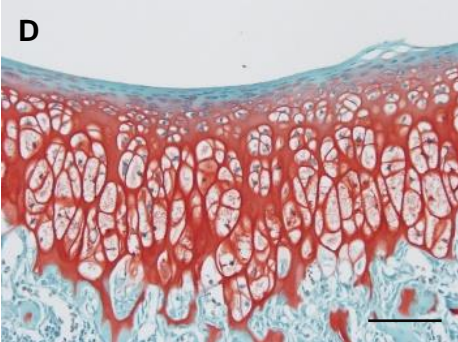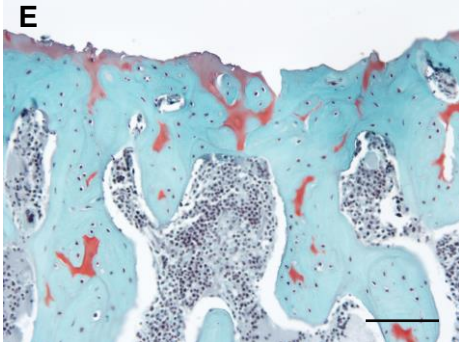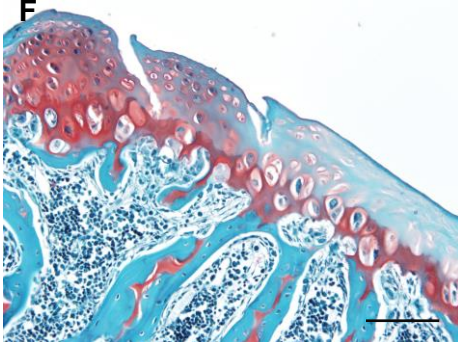



**Supplementary Figure 5 . Validation of human specific vimentin antibody staining**

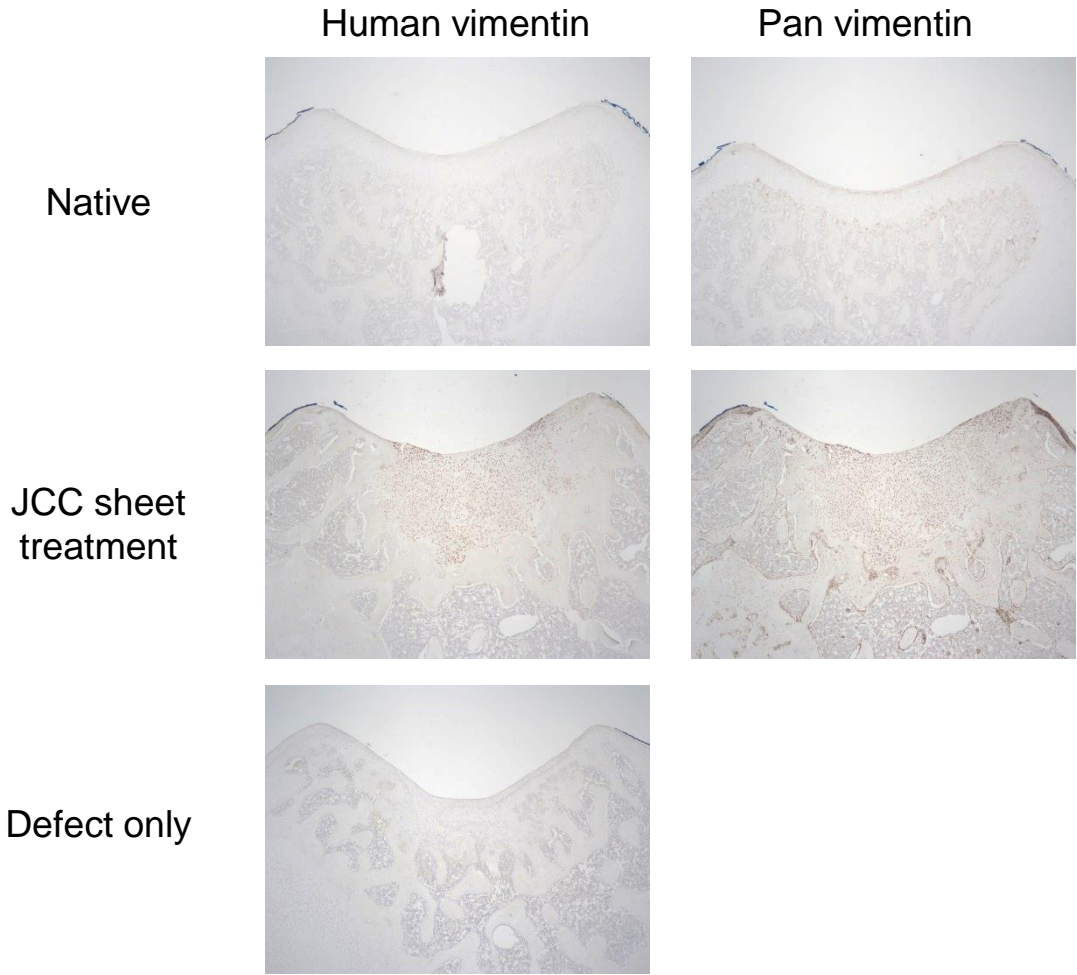

Supplementary Figure 6. All measured values of rat weight bearing experiment.

A

2 week individual values

3 week individual values

4 week individual values

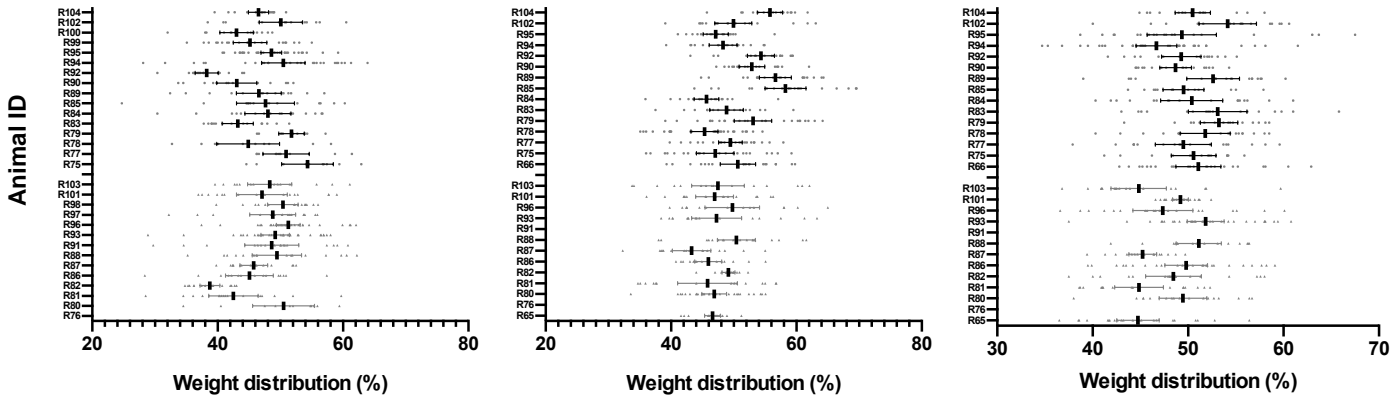

- JCC sheet treatment
- ▲ Defect only

B

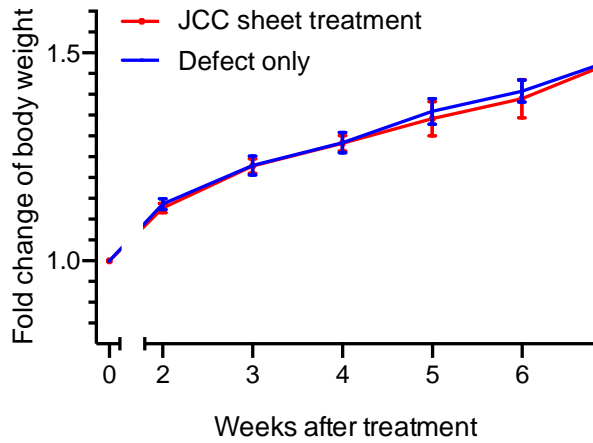

Supplement: 41536_2021_173_MOESM1_ESM.pdf [file 41536_2021_173_MOESM1_ESM.pdf]
