# Supplementary material for: Safety and efficacy of human juvenile chondrocyte-derived cell sheets for osteochondral defect treatment
Source: PubMed Central journal article supplement (PMC8520001; doi:10.1038/s41536-021-00173-9), 2021-10-15
Supplement: 41536_2021_173_MOESM2_ESM.pdf [file 41536_2021_173_MOESM2_ESM.pdf]

## Reporting Summary

Nature Research wishes to improve the reproducibility of the work that we publish. This form provides structure for consistency and transparency in reporting. For further information on Nature Research policies, see our [Editorial Policies](#) and the [Editorial Policy Checklist](#).

### Statistics

For all statistical analyses, confirm that the following items are present in the figure legend, table legend, main text, or Methods section.

n/a Confirmed

- |                                     |                                     |                                                                                                                                                                                                                                                            |
|-------------------------------------|-------------------------------------|------------------------------------------------------------------------------------------------------------------------------------------------------------------------------------------------------------------------------------------------------------|
| <input type="checkbox"/>            | <input checked="" type="checkbox"/> | The exact sample size ( $n$ ) for each experimental group/condition, given as a discrete number and unit of measurement                                                                                                                                    |
| <input type="checkbox"/>            | <input checked="" type="checkbox"/> | A statement on whether measurements were taken from distinct samples or whether the same sample was measured repeatedly                                                                                                                                    |
| <input type="checkbox"/>            | <input checked="" type="checkbox"/> | The statistical test(s) used AND whether they are one- or two-sided<br><i>Only common tests should be described solely by name; describe more complex techniques in the Methods section.</i>                                                               |
| <input type="checkbox"/>            | <input checked="" type="checkbox"/> | A description of all covariates tested                                                                                                                                                                                                                     |
| <input checked="" type="checkbox"/> | <input type="checkbox"/>            | A description of any assumptions or corrections, such as tests of normality and adjustment for multiple comparisons                                                                                                                                        |
| <input type="checkbox"/>            | <input checked="" type="checkbox"/> | A full description of the statistical parameters including central tendency (e.g. means) or other basic estimates (e.g. regression coefficient) AND variation (e.g. standard deviation) or associated estimates of uncertainty (e.g. confidence intervals) |
| <input type="checkbox"/>            | <input checked="" type="checkbox"/> | For null hypothesis testing, the test statistic (e.g. $F$ , $t$ , $r$ ) with confidence intervals, effect sizes, degrees of freedom and $P$ value noted<br><i>Give <math>P</math> values as exact values whenever suitable.</i>                            |
| <input checked="" type="checkbox"/> | <input type="checkbox"/>            | For Bayesian analysis, information on the choice of priors and Markov chain Monte Carlo settings                                                                                                                                                           |
| <input checked="" type="checkbox"/> | <input type="checkbox"/>            | For hierarchical and complex designs, identification of the appropriate level for tests and full reporting of outcomes                                                                                                                                     |
| <input checked="" type="checkbox"/> | <input type="checkbox"/>            | Estimates of effect sizes (e.g. Cohen's $d$ , Pearson's $r$ ), indicating how they were calculated                                                                                                                                                         |

*Our web collection on [statistics for biologists](#) contains articles on many of the points above.*

### Software and code

Policy information about [availability of computer code](#)

Data collection

Flow cytometry samples were analyzed with a cell analyzer (Canto, BD).  
Fluorescent signal representing cell number was measured with a spectrofluorometer (Cytation 3 image reader, BioTek)  
Weight distribution in rats was demonstrated with Incapacitance Tester, Linton Instrumentation.

Data analysis

Numeric data was summarized with Microsoft Excel or GraphPad Prism 7.  
Software used for statistical analysis was GraphPad Prism 7.  
FACS analysis was performed with FlowJo v10 software.

For manuscripts utilizing custom algorithms or software that are central to the research but not yet described in published literature, software must be made available to editors and reviewers. We strongly encourage code deposition in a community repository (e.g. GitHub). See the Nature Research [guidelines for submitting code & software](#) for further information.

### Data

Policy information about [availability of data](#)

All manuscripts must include a [data availability statement](#). This statement should provide the following information, where applicable:

- Accession codes, unique identifiers, or web links for publicly available datasets
- A list of figures that have associated raw data
- A description of any restrictions on data availability

Data sets generated and/or analyzed during the current study are available from the corresponding author upon reasonable request.

## Field-specific reporting

Please select the one below that is the best fit for your research. If you are not sure, read the appropriate sections before making your selection.

Life sciences  Behavioural & social sciences  Ecological, evolutionary & environmental sciences

For a reference copy of the document with all sections, see [nature.com/documents/nr-reporting-summary-flat.pdf](https://www.nature.com/documents/nr-reporting-summary-flat.pdf)

## Life sciences study design

All studies must disclose on these points even when the disclosure is negative.

|                 |                                                                                                                                                                                                                                   |
|-----------------|-----------------------------------------------------------------------------------------------------------------------------------------------------------------------------------------------------------------------------------|
| Sample size     | We use the minimum number of animals or cell samples necessary to fulfill statistical significance. We determined required sample sizes using preliminary data of defect model that showed no regeneration in any of the samples. |
| Data exclusions | All technically validated data was used.                                                                                                                                                                                          |
| Replication     | All of our findings were technically and biologically replicated and reproduced multiple times.                                                                                                                                   |
| Randomization   | Animals were allocated randomly into the different experimental group.                                                                                                                                                            |
| Blinding        | Treatment condition was blinded during the analyses of histology and weight bearing.                                                                                                                                              |

## Reporting for specific materials, systems and methods

We require information from authors about some types of materials, experimental systems and methods used in many studies. Here, indicate whether each material, system or method listed is relevant to your study. If you are not sure if a list item applies to your research, read the appropriate section before selecting a response.

### Materials & experimental systems

| n/a                                 | Involvement in the study                                        |
|-------------------------------------|-----------------------------------------------------------------|
| <input type="checkbox"/>            | <input checked="" type="checkbox"/> Antibodies                  |
| <input type="checkbox"/>            | <input checked="" type="checkbox"/> Eukaryotic cell lines       |
| <input checked="" type="checkbox"/> | <input type="checkbox"/> Palaeontology and archaeology          |
| <input type="checkbox"/>            | <input checked="" type="checkbox"/> Animals and other organisms |
| <input checked="" type="checkbox"/> | <input type="checkbox"/> Human research participants            |
| <input checked="" type="checkbox"/> | <input type="checkbox"/> Clinical data                          |
| <input checked="" type="checkbox"/> | <input type="checkbox"/> Dual use research of concern           |

### Methods

| n/a                                 | Involvement in the study                           |
|-------------------------------------|----------------------------------------------------|
| <input checked="" type="checkbox"/> | <input type="checkbox"/> ChIP-seq                  |
| <input type="checkbox"/>            | <input checked="" type="checkbox"/> Flow cytometry |
| <input checked="" type="checkbox"/> | <input type="checkbox"/> MRI-based neuroimaging    |

## Antibodies

### Antibodies used

FLOW CYTOMETRY  
 CD45 PB Biolegend 304021 HI30 (IgG1κ) B225702  
 HLA-ABC PB Biolegend 311417 W6/32 (IgG2a) B191432  
 CD31 AF488 Biolegend 303109 WM59 (IgG1κ) B190516  
 HLA -DR, -DP, -DQ FITC Biolegend 361705 Tu39 (IgG2a) B228758  
 CD44 PE Biolegend 338807 BJ18 (IgG1κ) B222834  
 CD90 PE Biolegend 328109 5E10 (IgG1κ) B206721  
 CD106 APC Biolegend 305809 STA (IgG1κ) B208208  
 CD81 APC BD 551112 JS-81 (IgG1κ) 8005529  
 Lineage (CD3, CD14, CD16, CD19, CD20, CD56) APC Biolegend 348803 Mix of 6 ab  
 (CD3, CD14, CD16, CD19, CD56: IgG1κ, CD20: IgG2b) B199913  
 Normal IgG1κ PB Biolegend 400131 MOPC-21 (IgG1κ) B229538  
 Normal IgG2a PB Biolegend 400235 MOPC-173 (IgG2a) B243657  
 Normal IgG1κ AF488 Biolegend 400129 MOPC-21 (IgG1κ) B220820  
 Normal IgG2a FITC Biolegend 400207 MOPC-173 (IgG2a) B235551  
 Normal IgG1κ PE Biolegend 400111 MOPC-21 (IgG1κ) B244596  
 Normal IgG1κ APC Biolegend 400120 MOPC-21 (IgG1κ) B257952  
 Normal IgG2b APC Biolegend 400319 MPC-11 (IgG2b) B202284

IMMUNOHISTOCHEMISTRY  
 COL II Mouse 2B1.5 (IgG2a) 1:200, 200 µg/mL Invitrogen (Thermo) MA5-12789  
 COL I Goat poly 1:200, 400 µg/mL Southern Biotech 1310-01  
 Aggrecan Goat poly 1:100, 200 µg/mL R&D AF1220  
 Human Vimentin Rabbit SP20 1:200, 10 - 50 µg/mL Abcam ab16700

Vimentin Rabbit EPR3776 1:400, 264 - 268 µg/ml Abcam Ab92547  
 Isotype Mouse IgG2a 1:100, 100 µg/mL Dako/Agilent X0943  
 Isotype Mouse IgG1κ DAK-GO1 1:10, 100 µg/mL Dako/Agilent X0931  
 Isotype Goat - 1:50, 100 µg/mL Chalbiodchem/Merck NI02-100UG  
 Isotype Rabbit - 1:200000, 15 mg/mL Dako X0936

#### SECONDARY ANTIBODIES

Mouse IgG Goat HRP 1:1000, 0.8 mg/mL Jackson 115-035-166  
 Goat IgG Donkey HRP 1:1000, 0.8 mg/mL Jackson 705-035-147  
 Rabbit IgG Goat HRP 1:1000, 0.8 mg/mL Jackson 111-035-144  
 Mouse IgG Donkey AF488 1:500 2 mg/mL Invitrogen (Thermo) A-21202  
 Rabbit IgG Goat AF568 1:500 2 mg/mL Invitrogen (Thermo) A-11011

#### Validation

Antibodies were validated according to manufacture's description. Specific validation of human vimentin antibody is shown in Supplemental Figure 5.

## Eukaryotic cell lines

### Policy information about [cell lines](#)

#### Cell line source(s)

HepG2

#### Authentication

This cell line was purchased from ATCC and used within minimal passage.

#### Mycoplasma contamination

The cell line was not tested for mycoplasma contamination.

#### Commonly misidentified lines (See [ICLAC](#) register)

We used this cell line in in vitro transformation assay as a anchorage-independent growing cell control. HepG2 is reidentified as hepatoblastoma cell line instead of hepatocyte carcinoma cell line (Lopez-Terrada et al 2009, PMID 19751877). Either case fulfills the purpose of use in our study.

## Animals and other organisms

### Policy information about [studies involving animals](#); [ARRIVE guidelines](#) recommended for reporting animal research

#### Laboratory animals

Sprague Dawley rats and nude (RNU) rats (6-week old) male and female, were purchased from Charles River Laboratories (Wilmington, USA). After a week of acclimatization at the animal facility, animals were employed for knee osteochondral defect regeneration study.

#### Wild animals

This study did not involve wild animals.

#### Field-collected samples

This study did not involve samples collected from the field.

#### Ethics oversight

The animal study plan was evaluated and approved by Institutional Animal Care & Use Committee (IACUC, University of Utah) (assigned ID: 17-09011).

Note that full information on the approval of the study protocol must also be provided in the manuscript.

## Flow Cytometry

### Plots

Confirm that:

- The axis labels state the marker and fluorochrome used (e.g. CD4-FITC).
- The axis scales are clearly visible. Include numbers along axes only for bottom left plot of group (a 'group' is an analysis of identical markers).
- All plots are contour plots with outliers or pseudocolor plots.
- A numerical value for number of cells or percentage (with statistics) is provided.

### Methodology

#### Sample preparation

Single cells from fabricated JCC sheets were isolated by incubation with TrypLE Select for 15 min and 0.25 mg/mL collagenase P (11 213 857 001, Roche, Basel, Switzerland) for 30 min. Cells were counted via hemocytometer and cell viability was demonstrated via trypan blue (T8154, MilliporeSigma) dye exclusion before allocating flow cytometry analysis.

#### Instrument

Flow cytometry samples were analyzed with a cell analyzer (Canto, BD).

#### Software

FACS analysis was performed with FlowJo v10 software.

#### Cell population abundance

All analysis was performed on the isolated cells from cultured cell sheets prepared at passage 2. More than 30,000 events were acquired. Vast majority of the events were located in the gate of PI-negative population.

Gating strategy

Doublets were excluded with FSC-W and SSC-W gating, then the PI-negative population was analyzed. Positive/negative threshold was determined by isotype control samples with the same number event acquisition. Isotype control histograms are overlaid on the sample data in the figure. Gating strategy is shown in Supplemental Figure 1.

Tick this box to confirm that a figure exemplifying the gating strategy is provided in the Supplementary Information.
